# Supplementary material
Source: MDPI journal article supplement (https://www.mdpi.com/2414-4088/6/4/26)
Supplement: s1 [file s1]

## Supplemental Material S4

### Survey 2

Your responses to this survey are anonymous and cannot be linked to your identity in any way.

**Participant #** \_\_\_\_\_

#### Section 1: Knowledge Test

The following questions relate to the computer-based training you completed earlier. This section is scored. It is important for our study that you do your best to provide the correct answers for each question.

##### (Declarative Knowledge – Posttest)

Which of the following is a station that is available for you to select when joining/rejoining the ship?

- ☐ Engineering
- ☐ Captain
- ☐ Pilot
- ☐ Viewscreen

Which of the following is a station that is available for you to select when joining/rejoining the ship?

- ☐ Science
- ☐ Captain
- ☐ Guide
- ☐ Mechanic

During the game, when can the Engineer switch to a new station?

- ☐ Anytime a station is unoccupied
- ☐ Anytime the Captain "Allows" the switch
- ☐ Anytime during the game as long as a repair isn't in progress
- ☐ Anytime the ship is in a neutral "uncontested" zone

In the image below which station are you currently **occupying**?

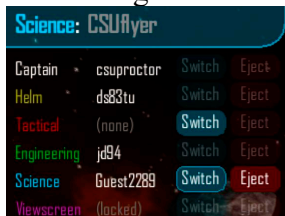

- ☐ Science
- ☐ Helm

- ☐ Engineering
- ☐ Tactical

Which of the enemy ships has the worst defenses and is easiest to destroy?

- ☐ Fighter
- ☐ Cruiser
- ☐ Drone
- ☐ Station

When a ship is cloaked you can do which of the following actions?

- ☐ Disrupt Cloak
- ☐ Scan
- ☐ View on screen
- ☐ Drain Shields

Which station is responsible for aiming the front of the ship towards the enemy ship being targeted?

- ☐ Helm
- ☐ Tactical
- ☐ Engineering
- ☐ Captain

What action is taken to increase the speed of the ship?

- ☐ Scroll up
- ☐ Zoom out
- ☐ Press the up arrow
- ☐ Press the space bar

Which station is responsible for communicating to the other team members which ships are attacking?

- ☐ Tactical
- ☐ Helm
- ☐ Captain
- ☐ Engineering

Which of the following has the longest cool down time?

- ☐ Torpedoes
- ☐ Beam Lasers
- ☐ Boosters
- ☐ Thrusters

Which station is responsible for communicating to the other team members the current health of the ship?

- ☐ Engineering
- ☐ Helm
- ☐ Captain
- ☐ Science

Which station can teleport the ship across large distances?

- ☐ Engineering
- ☐ Helm
- ☐ Captain
- ☐ Tactical

Which station is responsible for communicating to the other stations the health of an enemy ship?

- ☐ Science
- ☐ Engineering
- ☐ Tactical
- ☐ Captain

Which is the only station that can hack an enemy ship to temporarily disable their Weapons, Shields, or Engines?

- ☐ Science
- ☐ Engineering
- ☐ Tactical
- ☐ Captain

Which is the only station that can bring the ship to an immediate halt?

- ☐ Helm
- ☐ Captain
- ☐ Engineering
- ☐ Science

Which of the following keys would roll the ship right?

- ☐ E
- ☐ R
- ☐ X
- ☐ >

Which station needs to know the frequency of an attacking ship?

- ☐ Tactical
- ☐ Helm

- ☐ Engineering
- ☐ Science

What do the red letters in the top right corner represent?

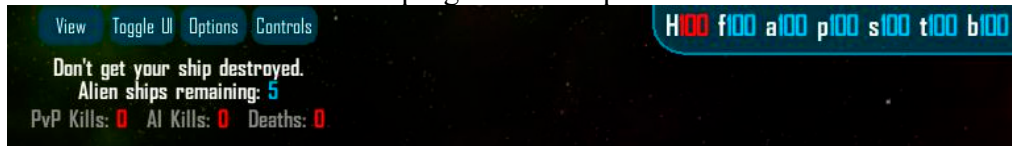

- ☐ Hull
- ☐ Helm
- ☐ Hit Points
- ☐ Healing

In the image below clicking 'range' will take the boost off which of the following?

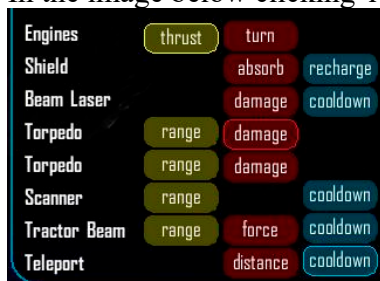

- ☐ thrust
- ☐ turn
- ☐ damage
- ☐ cooldown

Which station does the Tactical station need to communicate with to boost their cooldown?

- ☐ Engineering
- ☐ Helm
- ☐ Science
- ☐ Captain

Which station can use a tractor beam to push or pull another ship?

- ☐ Science
- ☐ Engineering
- ☐ Tactical
- ☐ Helm

Which of the following must happen before a Scan action can be done?

- ☐ The enemy must be within range
- ☐ The scan action must be boosted
- ☐ The enemy ship must be in view

☐ The ship must not be under attack

Which of the following races represents their fleet with ships colored yellow?

- ☐ Zurna
- ☐ Udu
- ☐ Santoor
- ☐ Davul

Which race has blue ships?

- ☐ Udu
- ☐ Davul
- ☐ Zurna
- ☐ Hive

Which race rivals the Santoor?

- ☐ Udu
- ☐ Davul
- ☐ Hive
- ☐ Zurna

Which race has the capabilities of using a phase shift?

- ☐ Udu
- ☐ Davul
- ☐ Zurna
- ☐ Santoor

## **Section 2. Training Debriefing**

In this section please explain your understanding of the activity you participated in.

### **(Debriefing Emotion)**

What type of emotional responses did you have to the activity? \_\_\_\_\_

### **(Debriefing Group/Individual)**

How do you think working **with a group/or individually** impacted your experience in the activity? \_\_\_\_\_

*All of the following measures use a 5-point scale  
Strongly Disagree, Disagree, Neither Agree nor Disagree, Agree, Strongly Agree*

## **Section 3: Activity Response**

The following questions relate to your **reactions and experiences in the activity.**

**(Psychological Meaning)**

- \_\_\_\_\_ My time was well spent in the activity.
- \_\_\_\_\_ Doing the activity was a meaningful experience.
- \_\_\_\_\_ My time doing the activity was **NOT** well spent. (R)
- \_\_\_\_\_ Doing the activity was worthwhile.
- \_\_\_\_\_ The activity was important to me.

**(Perceived Enjoyment)**

- \_\_\_\_\_ I was very satisfied with this activity.
- \_\_\_\_\_ I had a very positive experience in this activity.
- \_\_\_\_\_ I really enjoyed this activity.
- \_\_\_\_\_ This activity was very fun.
- \_\_\_\_\_ I would enjoy doing this activity again.
- \_\_\_\_\_ This activity was a waste of my time. (R)

**(Motivation)**

- \_\_\_\_\_ The activity was interesting to me.
- \_\_\_\_\_ The activity was dry and unappealing. (R)
- \_\_\_\_\_ This activity stimulated my curiosity.
- \_\_\_\_\_ The activity was repetitive. (R)
- \_\_\_\_\_ The variety of tasks in the activity helped keep my attention.
- \_\_\_\_\_ The activity was boring. (R)

**(Emotional Engagement)**

- \_\_\_\_\_ I was enthusiastic in this activity. (Emotion)
- \_\_\_\_\_ I felt energetic in this activity. (Emotion)
- \_\_\_\_\_ I was interested in this activity. (Emotion)
- \_\_\_\_\_ I felt proud of my work in this activity. (Emotion)
- \_\_\_\_\_ I felt positive about this activity. (Emotion)
- \_\_\_\_\_ I felt excited about this activity. (Emotion)

**(Physical Engagement)**

- \_\_\_\_\_ I worked with intensity in the activity. (Physical)
- \_\_\_\_\_ I exerted my full effort in the activity. (Physical)
- \_\_\_\_\_ I devoted a lot of energy to the activity. (Physical)
- \_\_\_\_\_ I tried my hardest to perform well in the activity. (Physical)
- \_\_\_\_\_ I strove as hard as I could to complete the activity. (Physical)
- \_\_\_\_\_ I exerted a lot of energy in this activity. (Physical)

**(Cognitive Engagement)**

- \_\_\_\_\_ During this activity, my mind was focused on the task at hand. (Cognitive)
- \_\_\_\_\_ During this activity, I paid a lot of attention to the task at hand. (Cognitive)
- \_\_\_\_\_ During this activity, I focused a great deal of attention on the task at hand. (Cognitive)
- \_\_\_\_\_ During this activity, I was absorbed by the task at hand. (Cognitive)
- \_\_\_\_\_ During this activity, I concentrated on the task at hand. (Cognitive)
- \_\_\_\_\_ During the activity, I devote a lot of attention to the task at hand. (Cognitive)

**(Perceived Value)**

- \_\_\_\_\_ It is clear to me how the content of this activity is related to things I already know.
- \_\_\_\_\_ There were aspects of this activity that could be important to some people.
- \_\_\_\_\_ The content of this activity is relevant to my interests.
- \_\_\_\_\_ The content of this activity is worth knowing.
- \_\_\_\_\_ The content of this activity was not relevant to my needs. (R)
- \_\_\_\_\_ The content of this activity will be useful to me.

**(Active Learning)**

- \_\_\_\_\_ I explored my own strategies in the activity.
- \_\_\_\_\_ In the activity I sought my own answers.
- \_\_\_\_\_ In the activity I solved my own problems.

Thank you for completing this survey.

Click the link below. You will be redirected to a short video describing the purpose of our study. When the video is done please let the researcher know and they will provide you with instructions for what to do next.

<https://youtu.be/jEbg8hdDPog>
