# Supplementary material
Source: MDPI journal article supplement (https://www.mdpi.com/2414-4088/6/4/26)
Supplement: s1 [file s1]

## Supplemental Material S1

### Learning objectives and sub-objectives for the Computer-Based Training (CBT)

| Objectives                | Sub-Objectives                                                                                                                                             |
|---------------------------|------------------------------------------------------------------------------------------------------------------------------------------------------------|
| Accessing the Game        | Participants will be able to locate and join the ship without assistance.                                                                                  |
| Using the Main Controls   | Participants can demonstrate knowledge of the main controls and can navigate the main controls screen.                                                     |
| Playing the Scenarios     | Participants will understand the scenarios of the game and the rules and goals for playing.                                                                |
| Knowing the Ship Stations | Participants know the purpose and abilities of the <i>Helm</i> station including controls and strategies.                                                  |
|                           | Participants know the purpose and abilities of the <i>Tactical</i> station including controls, strategies, and teammates to prioritize communication with. |
|                           | Participants know the purpose and abilities of the <i>Engineering</i> station including controls, strategies, and equipment this role is responsible for.  |
|                           | Participants know the purpose and abilities of the <i>Scientist</i> station including controls, strategies, equipment, and primary tasks.                  |
