# Supplementary material
Source: MDPI journal article supplement (https://www.mdpi.com/2414-4088/6/4/26)
Supplement: s1 [file s1]

## Supplemental Material S3

### Survey 1

Your responses to this survey are anonymous and cannot be linked to your identity in any way.

Participant # \_\_\_\_\_

#### Section 1: Knowledge Test

The following questions relate to the computer-based training you just completed. This section is scored. It is important for our study that you do your best to provide the correct answers for each question.

##### (Declarative Knowledge – Pretest)

Which of the following is a station that is available for you to select when joining/rejoining the ship?

- ☐ Science
- ☐ Captain
- ☐ Guide
- ☐ Mechanic

During the game, when can the Engineer switch to a new station?

- ☐ Anytime a station is unoccupied
- ☐ Anytime the Captain "Allows" the switch
- ☐ Anytime during the game as long as a repair isn't in progress
- ☐ Anytime the ship is in a neutral "uncontested" zone

Which of the enemy ships has the worst defenses and is easiest to destroy?

- ☐ Fighter
- ☐ Cruiser
- ☐ Drone
- ☐ Station

Which station is responsible for aiming the front of the ship towards the enemy ship being targeted?

- ☐ Helm
- ☐ Tactical
- ☐ Engineering
- ☐ Captain

Which of the following keys would roll the ship right?

- ☐ E
- ☐ R

☐ X

☐ >

Which station is responsible for communicating to the other team members, which ships are attacking?

☐ Tactical

☐ Helm

☐ Captain

☐ Engineering

Which of the following has the longest cool down time?

☐ Torpedoes

☐ Beam Lasers

☐ Boosters

☐ Thrusters

In the image below clicking 'range' will take the boost off which of the following?

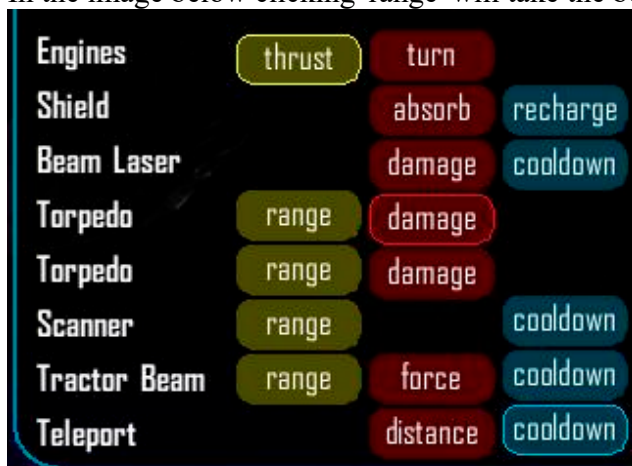

☐ thrust

☐ turn

☐ damage

☐ cooldown

Which station does the Tactical station need to communicate with to boost their cooldown?

☐ Engineering

☐ Helm

☐ Science

☐ Captain

Which is the only station that can hack an enemy ship to temporarily disable their Weapons, Shields, or Engines?

☐ Science

- ☐ Engineering
- ☐ Tactical
- ☐ Captain

Which station can use a tractor beam to push or pull another ship?

- ☐ Science
- ☐ Engineering
- ☐ Tactical
- ☐ Helm

Which race has the slowest ship?

- ☐ Davul
- ☐ Zurna
- ☐ Santoor
- ☐ Hive

Which race rivals the Santoor?

- ☐ Udu
- ☐ Davul
- ☐ Hive
- ☐ Zurna

Which race has the capabilities of using a phase shift?

- ☐ Udu
- ☐ Davul
- ☐ Zurna
- ☐ Santoor

## Section 2: Demographic Information

What is your current age in years (e.g., 18)? \_\_\_\_\_

How do you identify?

- ☐ Male
- ☐ Female
- ☐ Other \_\_\_\_\_

Which best describes your ethnicity? (select one)

- ☐ Caucasian
- ☐ Black
- ☐ Hispanic
- ☐ Asian

- ☐ Native American
- ☐ Hawaiian / Pacific Islander
- ☐ Other / Mixed Race (please explain) \_\_\_\_\_

**(Game Experience)**

*SCALE: Strongly Disagree, Disagree, Neither Agree nor Disagree, Agree, Strongly Agree*

The following questions relate to your experience **playing videogames**.

- \_\_\_\_\_ I currently play videogames several hours every week.
- \_\_\_\_\_ In the past I have spent several hours in one week playing videogames.
- \_\_\_\_\_ I have spent a lot of time reading videogame magazines or websites to find tips to improve my gaming skills
- \_\_\_\_\_ I have a high level of confidence with playing videogames in general.
- \_\_\_\_\_ I have a high level of skill at playing videogames in general.
- \_\_\_\_\_ Playing videogames is some of the most fun I have ever had in my life.
- \_\_\_\_\_ I consider myself to have a lot of videogame experience.
- \_\_\_\_\_ I would call myself a "serious gamer".
- \_\_\_\_\_ I would call myself a "casual gamer".
- \_\_\_\_\_ I am scared of videogames. (R)
- \_\_\_\_\_ I don't enjoy playing videogames at all. (R)
- \_\_\_\_\_ I have complete control over whether or not I do well in a videogame.
- \_\_\_\_\_ I am confident that I can perform well in a videogame.
- \_\_\_\_\_ I believe I have the ability to play videogames well.

Thank you for completing the survey.

Please let the researcher know you have finished the survey. They will provide you with instructions for what to do next.
