# Supplementary material
Source: MDPI journal article supplement (https://www.mdpi.com/2414-4088/6/4/26)

## Supplemental Material S2

### Procedures for experiment with final sample of participants

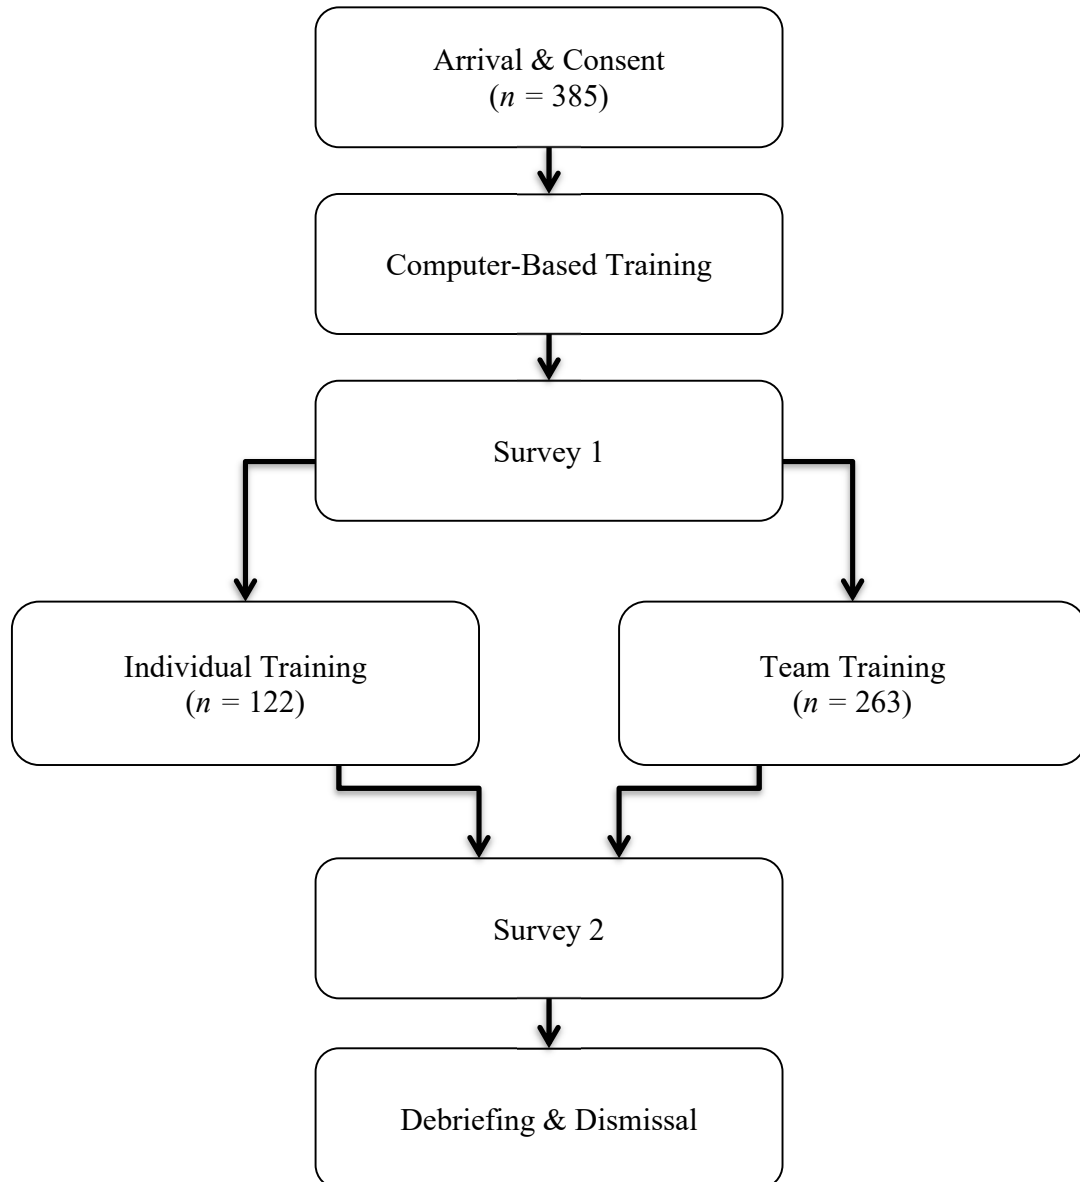

Supplement: s1 [file s1]
